# Supplementary material for: Context-dependent relationships between locus coeruleus firing patterns and coordinated neural activity in the anterior cingulate cortex
Source: eLife journal article supplement (doi:10.7554/elife.63490), 2022-01-07
Supplement: supp [file elife_poa_e63490_Figure_2_figure_supplement_1.pdf › elife_poa_e63490_Figure_2_figure_supplement_1.pdf]

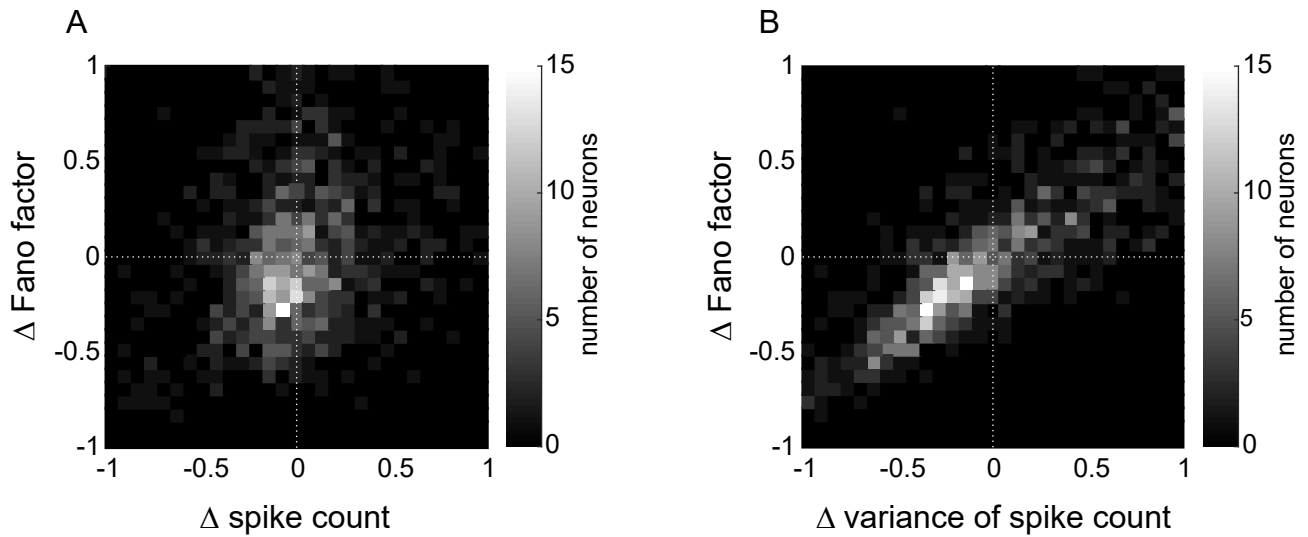

**Figure 2 – Figure Supplement 1. ACC single neuron spike count and variability conditioned on LC spiking (measured as differences between measurements from  $LC_{non-zero}$  versus  $LC_{zero}$  trials).** (A). Relationship between difference in Fano factor and difference in spike count; Spearman's  $\rho=0.27$ ,  $p=2.6 \times 10^{-17}$ . (B) Relationship between difference in Fano factor and difference in variance of spike count; Spearman's  $\rho=0.85$ ,  $p=0$ .
