# Supplementary material for: Context-dependent relationships between locus coeruleus firing patterns and coordinated neural activity in the anterior cingulate cortex
Source: eLife journal article supplement (doi:10.7554/elife.63490), 2022-01-07
Supplement: supp [file elife_poa_e63490_Figure_2_figure_supplement_2.pdf › elife_poa_e63490_Figure_2_figure_supplement_2.pdf]

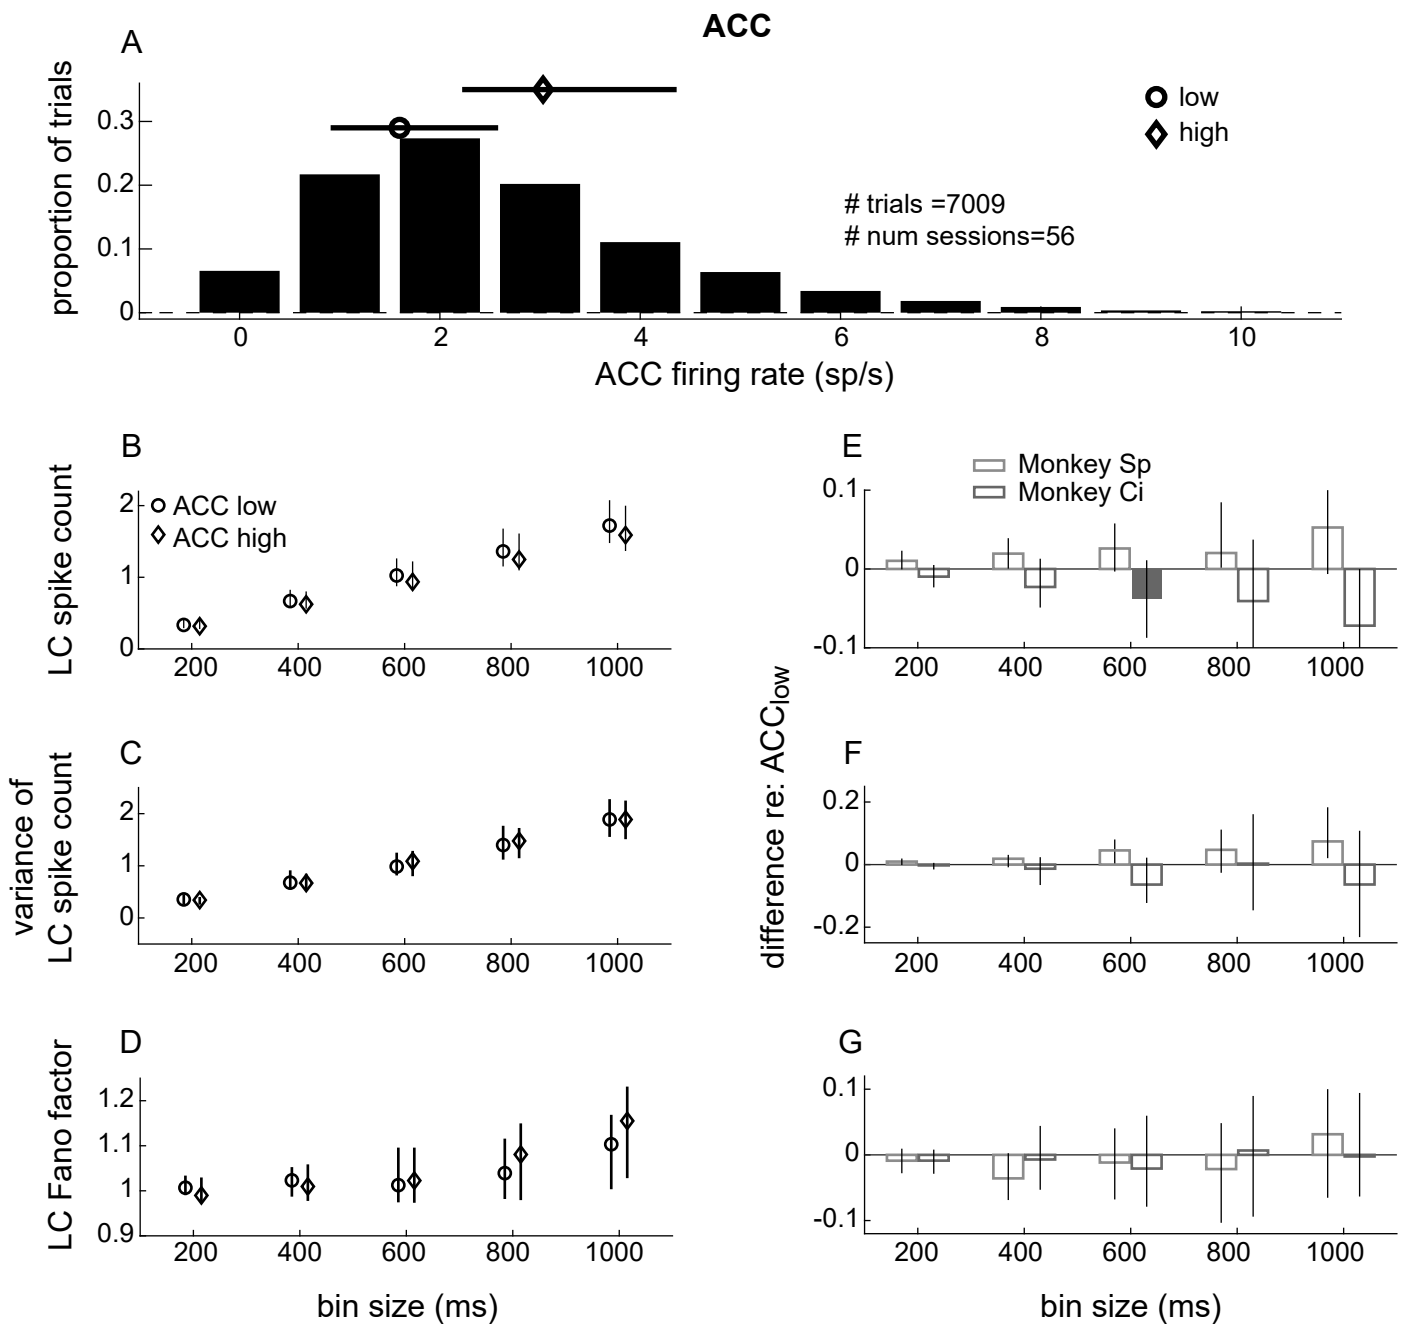

**Figure 2 – Figure Supplement 2. LC single-unit spike count statistics conditioned on simultaneously measured ACC spiking.** (A) ACC single-unit firing-rate distribution measured in 1.1 s windows starting 1 s after the onset of stable fixation from all trials and recording sessions. The circle and diamond symbols and lines indicate the median and IQR of trials defined as “low” and “high” ACC spike counts (median split per session), respectively. (B–D) LC single-unit (B) spike count, (C) variance of spike count, and (D) Fano factor (variance/mean) from trials in which the simultaneously measured ACC activity (mean firing rate of all single units) was low or high as indicated by the markers defined in B. LC spikes were counted in 5 equally spaced bins ranging from 200 ms to 1 s. Symbols and error bars are median and bootstrapped 95% confidence intervals of the values computed by pooling the data across all units recorded from both monkeys. (E,F,G) Difference between each value from panels B,C,D, respectively, measured between the ACC<sub>high</sub> condition and the ACC<sub>low</sub> condition. Bars and error bars are the median and bootstrapped 95% confidence interval of the distribution of values computed per LC unit. Filled bars and symbols above indicate  $p < 0.05$  for sign rank tests for: 1)  $H_0$ : median difference between ACC<sub>low</sub> and ACC<sub>high</sub> conditions tested separately for each monkey = 0 (filled bars), and 2)  $H_0$ : median difference between ACC<sub>low</sub> and ACC<sub>high</sub> conditions tested using data combined from both monkeys = 0 (\*, none found).
