# Supplementary material for: Context-dependent relationships between locus coeruleus firing patterns and coordinated neural activity in the anterior cingulate cortex
Source: eLife journal article supplement (doi:10.7554/elife.63490), 2022-01-07
Supplement: supp [file elife_poa_e63490_Figure_4_figure_supplement_1.pdf › elife_poa_e63490_Figure_4_figure_supplement_1.pdf]

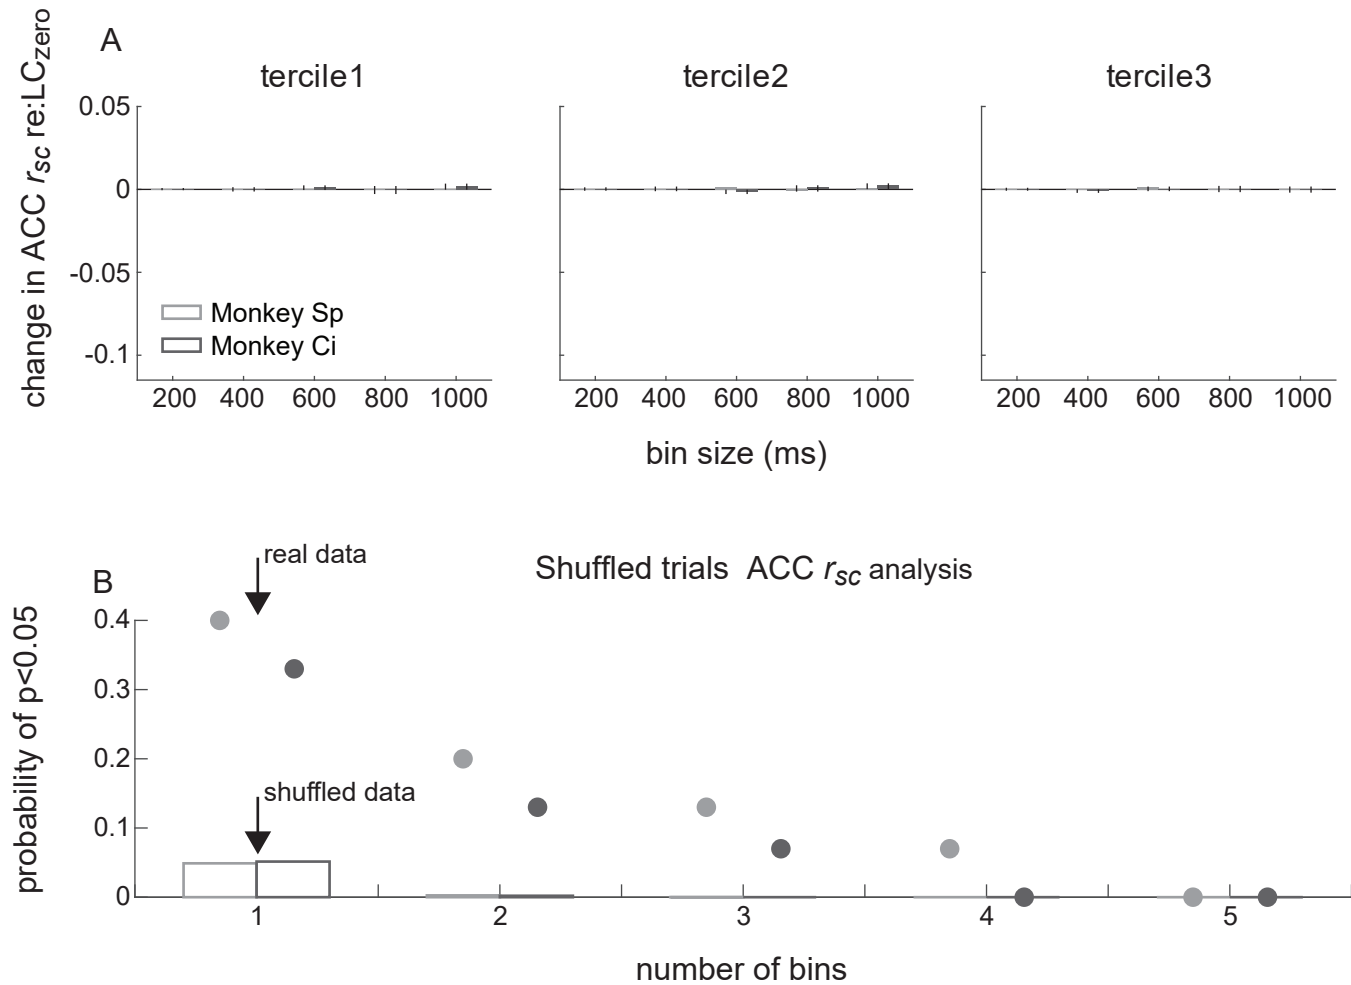

**Figure 4 – Figure Supplement 1. ACC  $r_{sc}$  conditioned on simultaneously measured LC spiking using shuffled trials.** (A) Shuffled ACC  $r_{sc}$  data conditioned on LC spiking, separated into terciles (panels, as labeled) of LC-independent values, plotted as in Figure 4A–C. Bootstrapped 95% confidence intervals are plotted as vertical lines (same ordinate scaling as Figure 4; bars and lines too small for visibility in most cases). (B) Probability of obtaining a statistically reliable difference in ACC  $r_{sc}$  on LC<sub>zero</sub> vs. LC<sub>non-zero</sub> trials (sign-rank test,  $p < 0.05$ ) in the given number of adjacent time bins tested. The time bins are 200, 400, 600, 800, and 1000 ms, as in A, tested separately for each of the three terciles. Bars are for shuffled data, markers above bars are for the real (i.e., unshuffled) data, calculated separately for each monkey (shading). Thus, the probability of 0.4 for monkey Ci (dark symbol), bin size = 1, corresponds to the 6/15 single bins from Figure 4D–F for which we rejected the null hypothesis that the mean difference=0. Note that the probability of finding effects in up to three adjacent time bins from the real data was substantially higher than would be expected by chance (i.e., as predicted from the shuffled data).
