# Supplementary material for: Context-dependent relationships between locus coeruleus firing patterns and coordinated neural activity in the anterior cingulate cortex
Source: eLife journal article supplement (doi:10.7554/elife.63490), 2022-01-07
Supplement: supp [file elife_poa_e63490_Figure_4_figure_supplement_2.pdf › elife_poa_e63490_Figure_4_figure_supplement_2.pdf]

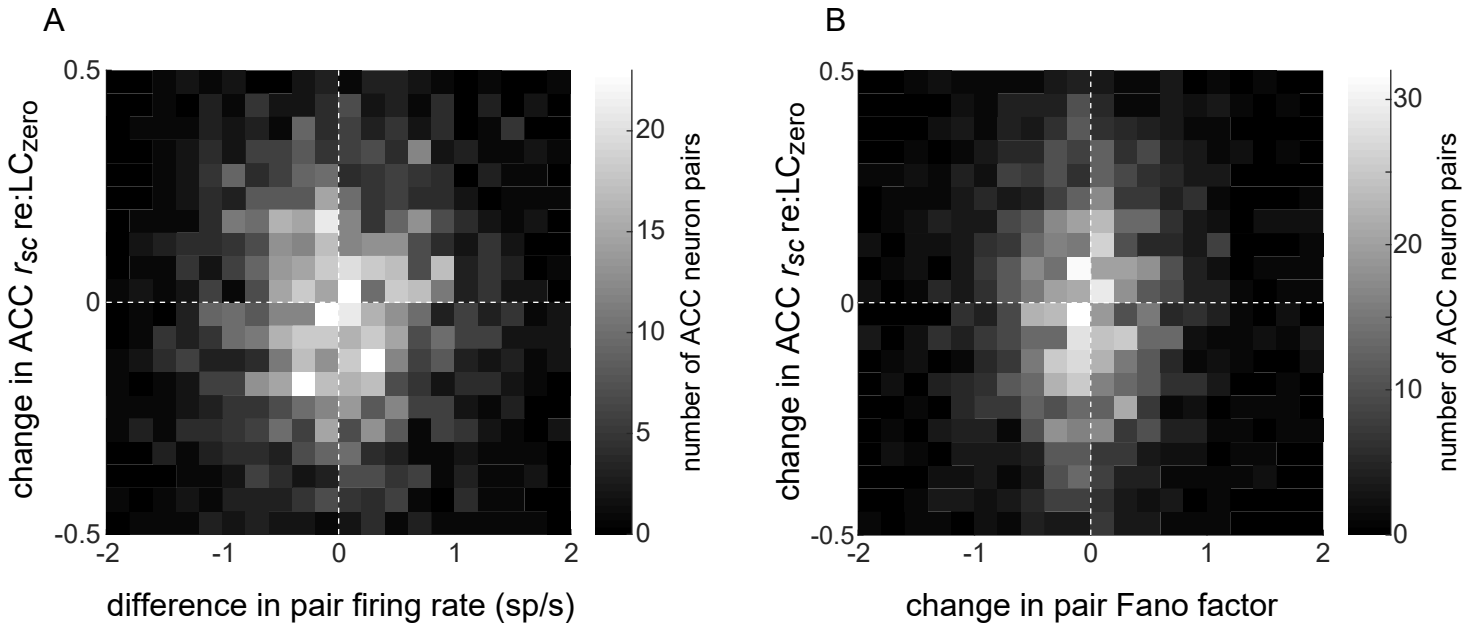

**Figure 4 – Figure Supplement 2. Relationship between LC-linked changes in ACC spiking and ACC  $r_{sc}$ .** (A) For each simultaneously recorded pair of ACC units and single LC unit, the difference in ACC  $r_{sc}$  computed from LC<sub>non-zero</sub> versus LC<sub>zero</sub> trials (ordinate) is plotted versus the difference in the mean spike rate of the two ACC units computed from LC<sub>non-zero</sub> versus LC<sub>zero</sub> trials (abscissa). Spearman's  $\rho=0.02$ ,  $p=0.45$ . (B) Same as A but with the ACC pair Fano factor on the abscissa. Spearman's  $\rho=0.05$ ,  $p=0.01$ .
