# Supplementary material for: Context-dependent relationships between locus coeruleus firing patterns and coordinated neural activity in the anterior cingulate cortex
Source: eLife journal article supplement (doi:10.7554/elife.63490), 2022-01-07
Supplement: supp [file elife_poa_e63490_Figure_4_figure_supplement_3.pdf › elife_poa_e63490_Figure_4_figure_supplement_3.pdf]

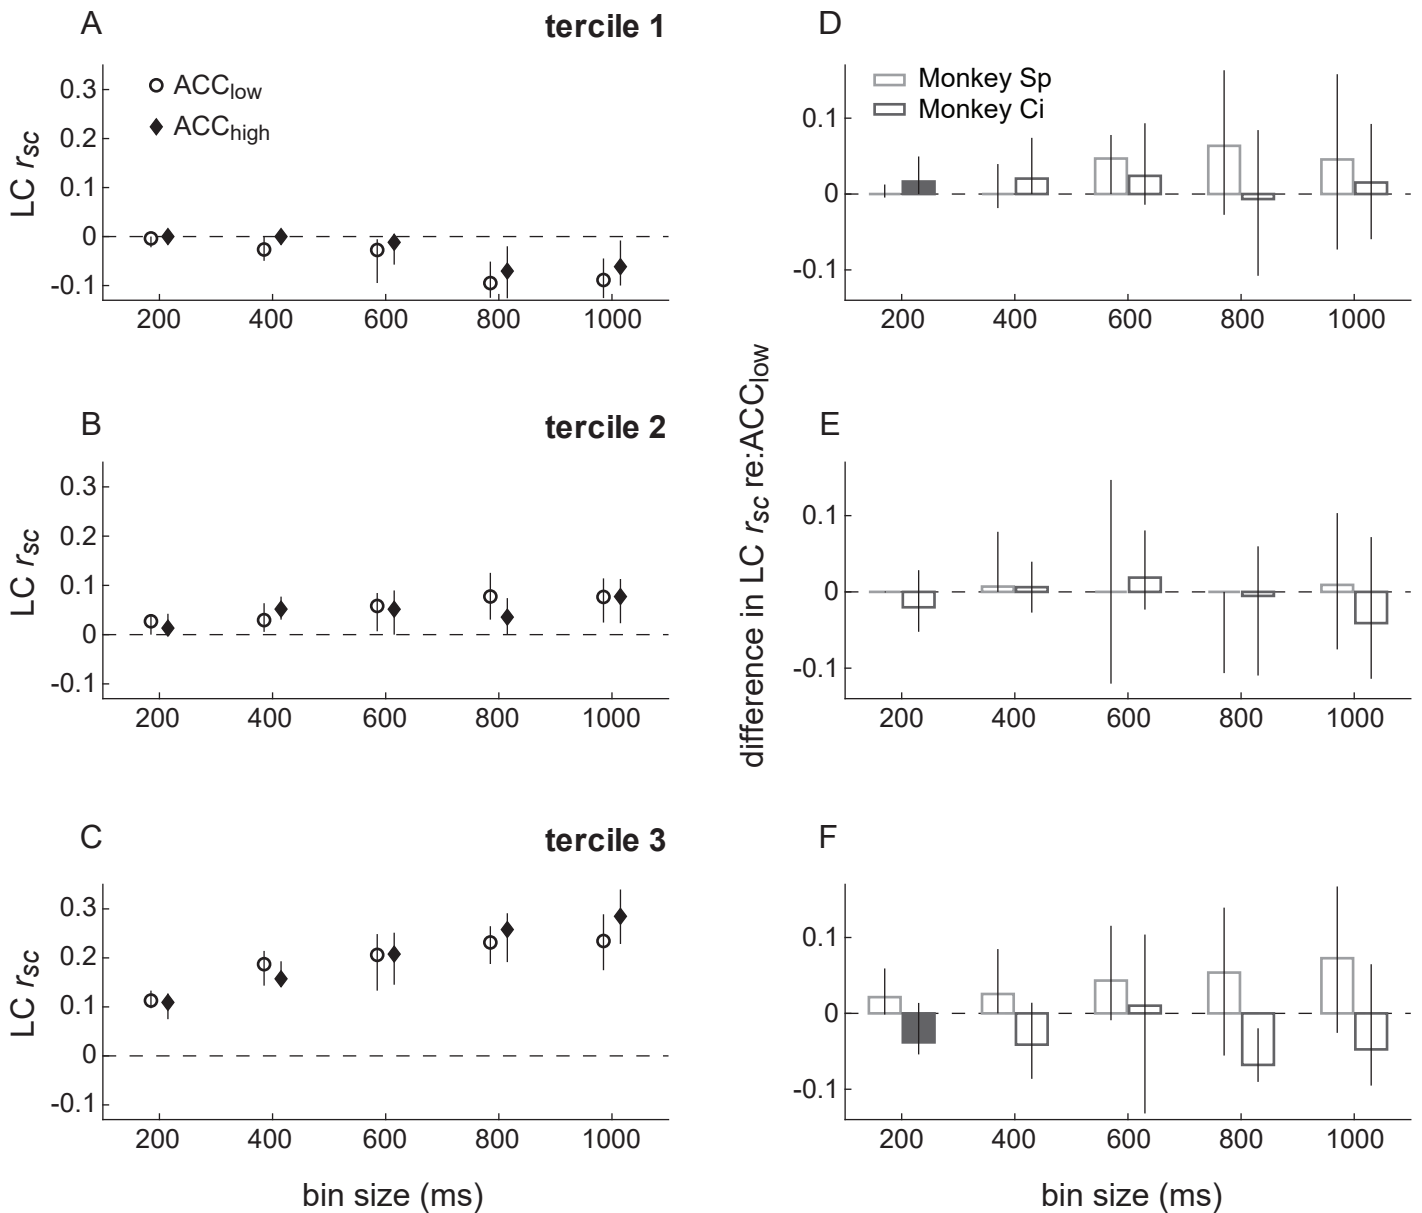

**Figure 4 – Figure Supplement 3. Spike-count correlations ( $r_{sc}$ ) within LC conditioned on simultaneously measured ACC spiking.** (A,B,C) LC  $r_{sc}$  plotted as a function of bin size separately for trials in which the simultaneously recorded ACC unit had a relatively low or high firing rate, as indicated in A. The three panels separate data by LC pairs with  $r_{sc}$  values that, without reference to ACC firing and for each bin size, were in the lower (A), middle (B), or upper (C) tertile from all recorded LC pairs. Symbols and error bars are median and bootstrapped 95% confidence intervals across the given set of ACC pairs. (D,E,F) Difference in LC  $r_{sc}$  between  $ACC_{low}$  versus  $ACC_{high}$  conditions, relative to the ACC low condition, computed for each LC pair and plotted separately for the tertiles in A,B,C, respectively. Bars and error bars are median and bootstrapped 95% confidence intervals across the given set of LC pairs. Filled bars and symbols indicate  $p < 0.05$  for sign rank tests for  $H_0$ : median difference between  $ACC_{low}$  and  $ACC_{high}$  conditions = 0 tested: 1) separately for each monkey (filled bars), and 2) using data combined from both monkeys (\*, none found).
