# Supplementary material for: Context-dependent relationships between locus coeruleus firing patterns and coordinated neural activity in the anterior cingulate cortex
Source: eLife journal article supplement (doi:10.7554/elife.63490), 2022-01-07
Supplement: supp [file elife_poa_e63490_Figure_5_figure_supplement_2.pdf › elife_poa_e63490_Figure_5_figure_supplement_2.pdf]

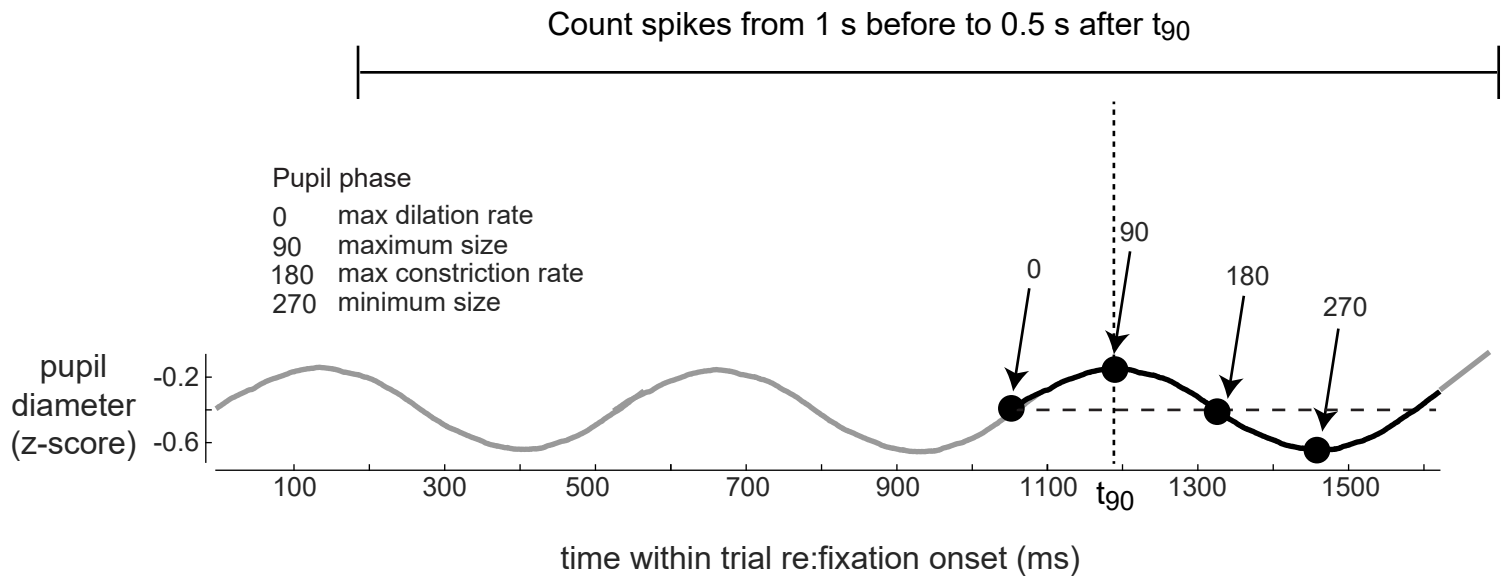

**Figure 5 – Figure Supplement 2. Measurement of spikes relative to pupil phase.** Schematic of a pupil trace from a single trial showing principal phases (left; 0°, 90°, 180°, and 270°). One analyzed cycle is shown in bold with the time for phase=90° indicated as  $t_{90}$ . LC and ACC spikes were counted in 500 ms bins in a 1.5 s window (indicated by the horizontal line above) and used to calculate the LC PETH and ACC  $r_{sc}$  relative to this phase (and similarly for all phases between 0° and 360°, in 15° steps).
