# Supplementary material for: Context-dependent relationships between locus coeruleus firing patterns and coordinated neural activity in the anterior cingulate cortex
Source: eLife journal article supplement (doi:10.7554/elife.63490), 2022-01-07
Supplement: supp [file elife_poa_e63490_Figure_6_figure_supplement_1.pdf › elife_poa_e63490_Figure_6_figure_supplement_1.pdf]

ACC neurons. Beep aligned spikes, sorted by peak response to beep

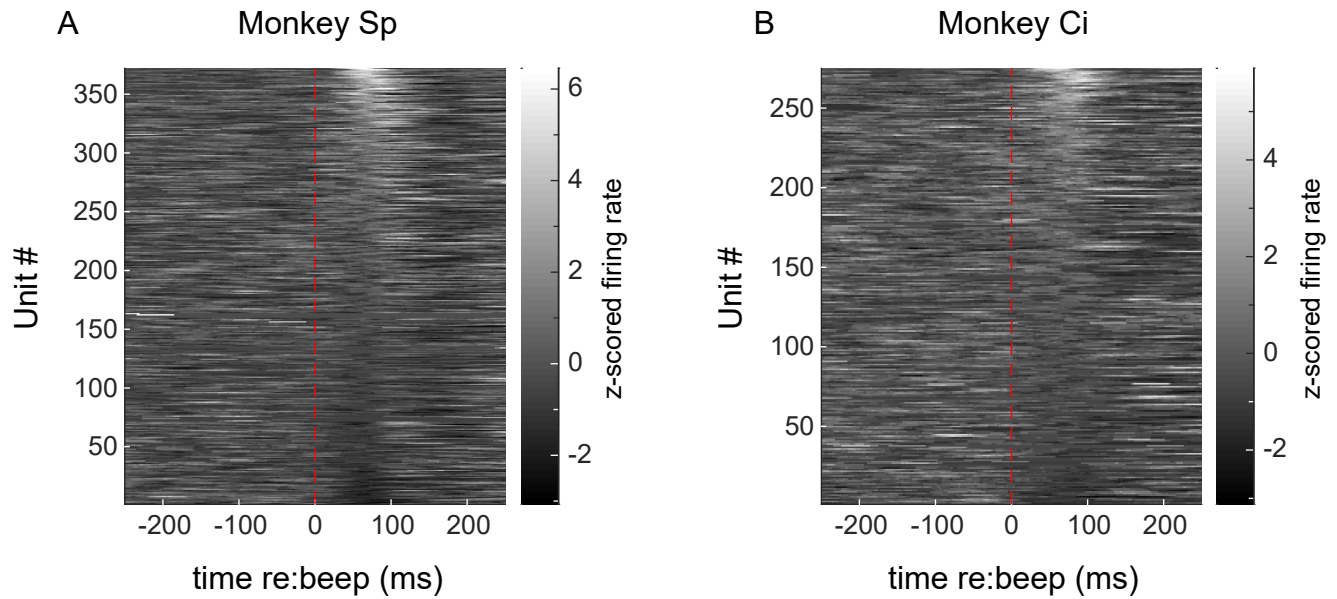

**Figure 6 – Figure Supplement 1. ACC single-unit responses to the startle stimulus (beep).** Average PSTHs aligned to beep onset from all units recorded from Monkey Sp (A) and monkey Ci (B).
