# Supplementary material for: Context-dependent relationships between locus coeruleus firing patterns and coordinated neural activity in the anterior cingulate cortex
Source: eLife journal article supplement (doi:10.7554/elife.63490), 2022-01-07
Supplement: supp [file elife_poa_e63490_Figure_7_figure_supplement_1.pdf › elife_poa_e63490_Figure_7_figure_supplement_1.pdf]

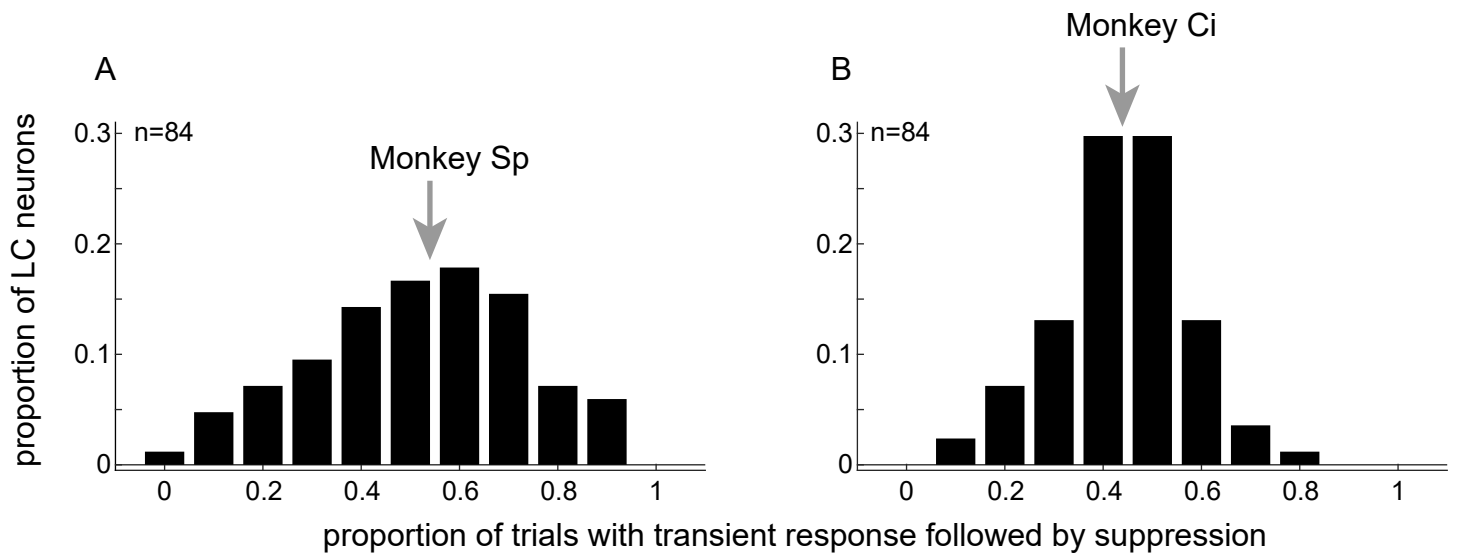

**Figure 7 – Figure Supplement 1. Consistency of LC responses to startling sounds.** Histograms showing the proportion of LC neurons from monkey Sp (A) and Ci (B) that exhibited a characteristic transient response followed by suppression for the given proportion of beep trials. Arrows indicate median values.
