# Supplementary material for: Context-dependent relationships between locus coeruleus firing patterns and coordinated neural activity in the anterior cingulate cortex
Source: eLife journal article supplement (doi:10.7554/elife.63490), 2022-01-07
Supplement: supp [file elife_poa_e63490_Figure_7_figure_supplement_2.pdf › elife_poa_e63490_Figure_7_figure_supplement_2.pdf]

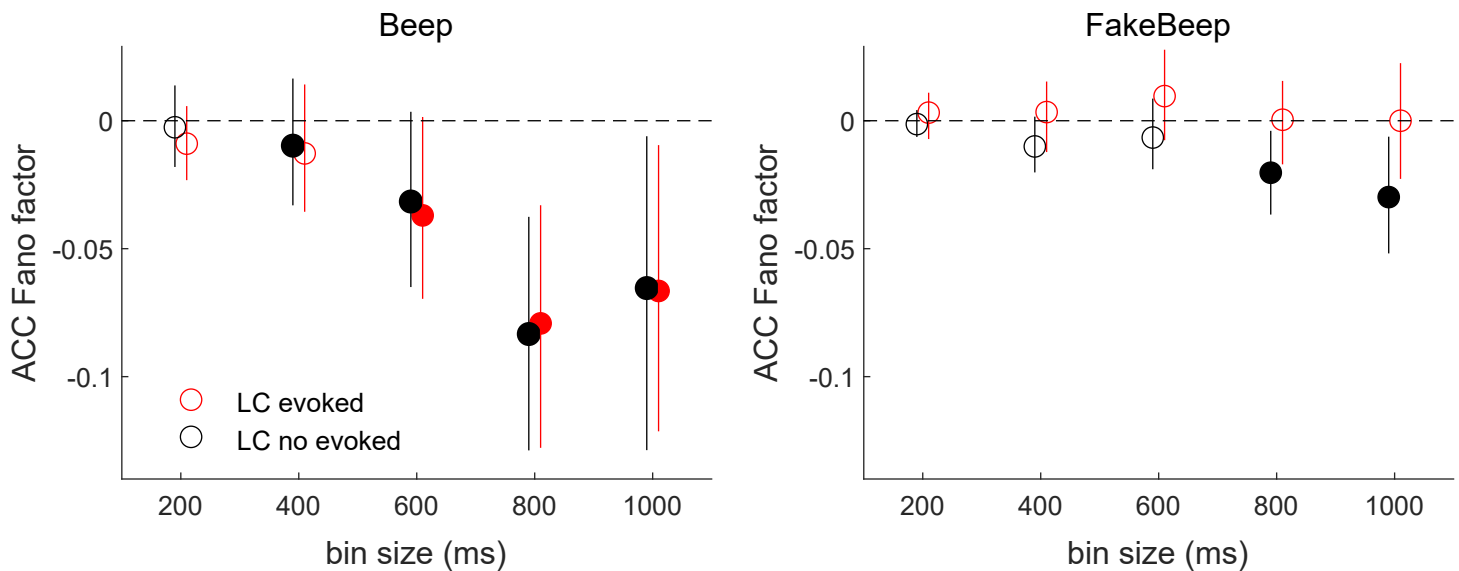

**Figure 7 – Figure Supplement 2. Differences in ACC Fano factor in response to startling events, conditioned on LC spiking.** (A) Beep related difference in ACC Fano factor for trials in which LC had an evoked response relative to trials in which LC had no evoked response, plotted as a function of the bin size used to count spikes in ACC. Circles and vertical lines are median and bootstrapped 95% confidence estimates across the given set of ACC neurons. (B) Data from “fake-beep trials” (trials with no beep but sorted according to whether or not there was a transient increase in LC spiking comparable in magnitude to the beep-evoked response), plotted as in A. In both panels, Mann-Whitney U-test for  $H_0$ : median difference in ACC Fano factor (after relative to before the beep or “fake-beep”) between the two groups (LC evoked and no evoked) is different for the given bin size,  $p < 0.05$  for both monkeys data pooled together (\*, none found); filled circles indicate sign-rank test for  $H_0$ : ACC Fano factor differences (after relative to before the beep) within each group are different from zero,  $p < 0.05$  for both monkeys data pooled together.
