# Supplementary material for: Context-dependent relationships between locus coeruleus firing patterns and coordinated neural activity in the anterior cingulate cortex
Source: eLife journal article supplement (doi:10.7554/elife.63490), 2022-01-07
Supplement: supp [file elife_poa_e63490_Figure_8_figure_supplement_1.pdf › elife_poa_e63490_Figure_8_figure_supplement_1.pdf]

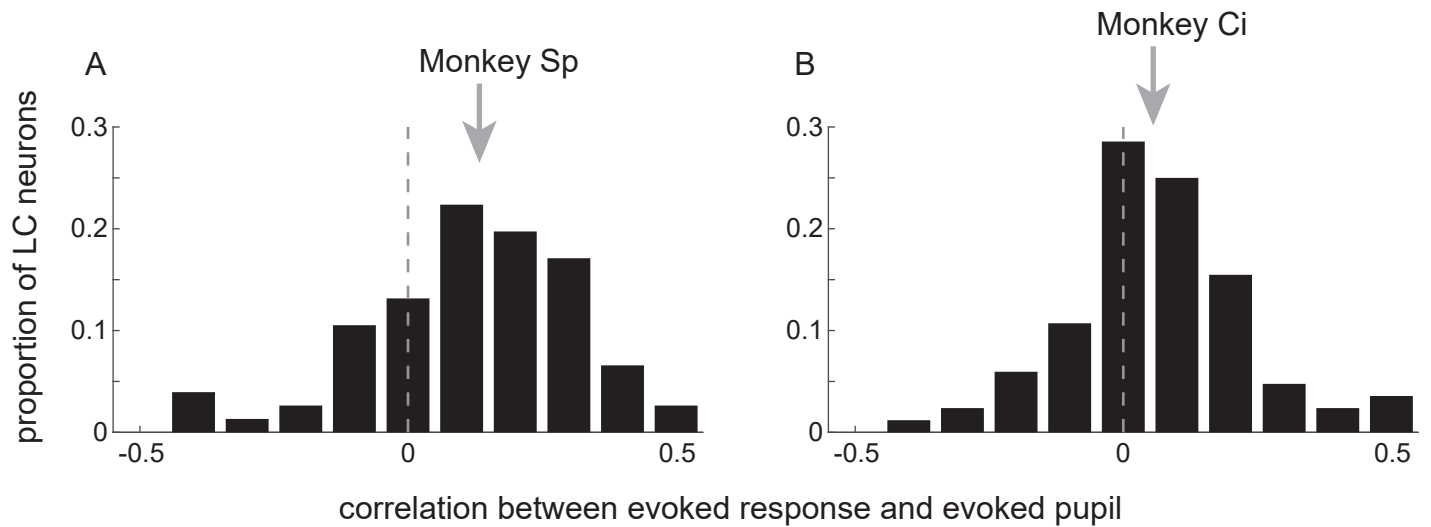

**Figure 8 – Figure Supplement 1. Relationship between startling sound-driven changes in pupil diameter and transient LC activation.** Distribution of correlation coefficients describing unit-specific relationships between the size of the pupil response and the size of the evoked LC response to beep presentation for monkey Sp (A) and Ci (B). Arrows indicate median values (sign-rank test for  $H_0$ : median=0,  $p<0.001$  in both cases).
